# Supplementary material for: Artificial Intelligence–Generated Draft Replies to Patient Inbox Messages
Source: PubMed Central journal article supplement (PMC10955355; doi:10.1001/jamanetworkopen.2024.3201), 2024-03-20
Supplement: jamanetwopen-e243201-s001.pdf [file jamanetwopen-e243201-s001.pdf]

## Supplemental Online Content

Garcia P, Ma SP, Shah S, et al. Artificial intelligence–generated draft replies to patient inbox messages. *JAMA Netw Open*. 2024;7(3):e243201. doi:10.1001/jamanetworkopen.2024.3201

**eFigure 1.** Large Language Model Integration

**eFigure 2.** Mock User Interface

**eTable 1.** Application of RE-AIM/PRISM for Evaluation of Implementation

**eTable 2.** Other Action Inclusions and Exclusions

**eFigure 3.** Time Metric Definitions

**eFigure 4.** Pre- and Postsurvey Questionnaire

**eFigure 5.** Clinician Recruitment Flowchart

**eFigure 6.** Histogram of Draft Utilization per Clinician With Pareto

**eFigure 7.** Draft Utilization vs Reply Action Count per Clinician

**eTable 3.** Draft Availability for All Unique Messages Viewed, Acted on or Replied to

**eFigure 8.** Average Time Spent per Clinician on Actions in Prepilot vs Pilot Periods

**eFigure 9.** Average Time Spent on Actions in Prepilot vs Pilot Periods Using a Linear Mixed Effects Model

**eTable 4.** Impact of Draft Messages on Change in Log-Transformed Time Spent, Analyzed by Linear Mixed Effects Models

This supplemental material has been provided by the authors to give readers additional information about their work.

**eFigure 1. Large Language Model Integration**

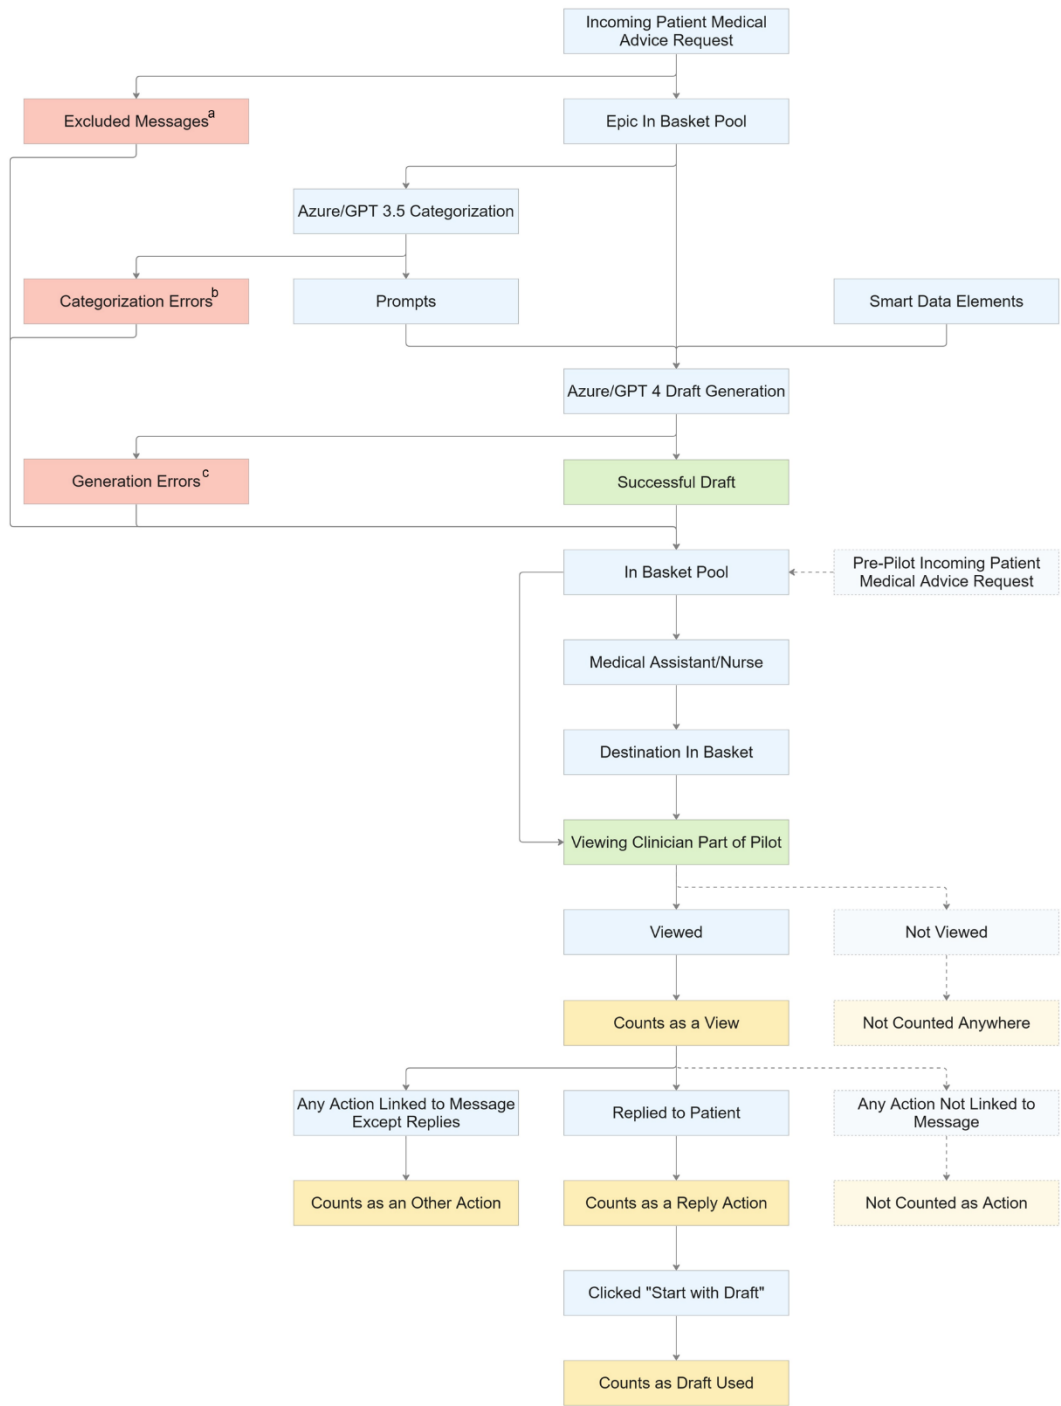

**a**, Excluded messages include: 1) recipient not part of the pilot, 2) non-English language, 3) contains attachment, 4) sender was a proxy  
**b**, Categorization errors include: 1) insufficient compute (*HTTP timeout was hit for OpenAI, Request to LLM timed out*)  
**c**, Generation errors include: 1) prompt or message exceeds token limit (*Max model length was reached, Response cutoff due to max length limits*), 2) insufficient compute (*HTTP timeout was hit for OpenAI, Request to LLM timed out*), 3) prompt or message filtered for inappropriate content (*Prompt was filtered, Response to prompt was filtered*), 4) communication failure between Azure and language model (*API error*)

**eFigure 2. Mock User Interface**  
© 2024 Epic Systems Corporation. Used with permission.

 **New grandpa** (Newest Message First)

**George Adams** → P Triage Nurses (supporting Drew Walker, MD) Just Now (4:55 PM)

 Hi Dr. Walker, I forgot to tell you I'm a new grandpa! She's adorable but also is frequently sick. Do I need to be concerned that being around her germs will hurt my aortic valve?

 **Generated Draft Reply**  AI Pioneering

Hello George,

Congratulations on becoming a new grandpa! It's wonderful to hear about your adorable granddaughter. Regarding your concern about your aortic valve, it's important to maintain good hygiene practices, such as washing your hands frequently and avoiding close contact if she is sick. However, if you have specific concerns about your aortic valve or your overall health, I would recommend scheduling an appointment to discuss this further.

Please don't hesitate to reach out if you have any more questions or concerns.

Best,  
Dr. Walker

 [Learn More](#)  Start with Draft  Start Blank Reply

Did you find the draft reply helpful?

 This was helpful  This was not helpful

**eTable 1. Application of RE-AIM/PRISM for Evaluation of Implementation**

| <b>Category</b>                               | <b>Data Source</b> | <b>Study Measure</b>                                       |
|-----------------------------------------------|--------------------|------------------------------------------------------------|
| Reach                                         | EHR                | Volume of providers in pilot                               |
|                                               |                    | Volume of messages sent                                    |
|                                               |                    | Draft Utilization                                          |
| Effectiveness                                 | EHR                | Time                                                       |
|                                               | Surveys            | Burden                                                     |
|                                               |                    | Burnout and professional fulfillment                       |
| Adoption                                      | Surveys            | Barriers to/facilitators of adoption                       |
| Implementation                                | Surveys            | Barriers to/facilitators of implementation                 |
| Clinician Characteristics                     | Surveys            | Demographic characteristics of participating clinicians    |
| External Environment                          | Surveys            | National healthcare context (burnout)                      |
| Clinician Perspectives on the Intervention    | Surveys            | NPS                                                        |
|                                               |                    | AI tool usability                                          |
|                                               |                    | AI tool accuracy                                           |
| Sustainability and Maintenance Infrastructure | Surveys            | Barriers to/facilitators of maintenance and sustainability |

**eTable 2. Other Action Inclusions and Exclusions**

| <b>Criteria</b> | <b>Code</b>     | <b>Action</b>                                  |
|-----------------|-----------------|------------------------------------------------|
| Inclusion       | R HIC 102       | REPLY TO SENDER                                |
| Inclusion       | R HIC 106       | FORWARD MESSAGE                                |
| Inclusion       | R HIC 114       | READ MESSAGE                                   |
| Inclusion       | R HIC 115       | PEND MESSAGE                                   |
| Inclusion       | R HIC 118       | REPLY TO ALL                                   |
| Inclusion       | R HIC 155       | TAKE RESPONSIBILITY                            |
| Inclusion       | R HIC 156       | PUT RESPONSIBILITY BACK                        |
| Inclusion       | R HIC 161       | RECALL MESSAGE                                 |
| Inclusion       | R HIC 162       | MOVE TO MY MESSAGES                            |
| Inclusion       | R HIC 163       | IB FORWARD MESSAGES                            |
| Inclusion       | R HIC 1018      | FOLLOW UP                                      |
| Inclusion       | R HIC 1019      | GENERAL PROPERTIES – NO FOLLOWUP               |
| Inclusion       | R HIC 2004      | PATIENT REVIEW                                 |
| Inclusion       | R HIC 2005      | CREATE TELEPHONE CALL                          |
| Inclusion       | R HIC 2155      | TAKE PUT BACK RESPONSIBILITY SUBMENU           |
| Inclusion       | R HIC 3210      | MYCHART – HYPERSPACE ENCOUNTER CREATION        |
| Inclusion       | R HIC 3216      | PLACE ORDER AFTER OPENING MYCHART ENCOUNTER    |
| Inclusion       | R HIC 3240      | MYCHART – NO ACTION REQUIRED MESSAGE HANDLED   |
| Inclusion       | R HIC 3241      | MYCHART – CALLED PATIENT MESSAGE HANDLED       |
| Inclusion       | R HIC 8999      | UNDEFER TO WORKSTATION                         |
| Inclusion       | R HIC 9000      | DEFER TO WORKSTATION                           |
| Inclusion       | R HIC 9511      | IB DISMISS LPG INTRO                           |
| Inclusion       | R HIC 9550      | IB SUGGESTED RESPONSE                          |
| Inclusion       | R HIC 9551      | IB SUGGESTED RESPONSE IS USEFUL                |
| Inclusion       | R HIC 9552      | IB SUGGESTED RESPONSE DEFICIENCIES             |
| Inclusion       | R HIC 210101301 | SHC AMB POSTPONE MESSAGE – TOMORROW            |
| Inclusion       | R HIC 210101302 | SHC AMB POSTPONE MESSAGE – 3 DAYS              |
| Inclusion       | R HIC 210101303 | SHC AMB POSTPONE MESSAGE – 7 DAYS              |
| Inclusion       | R HIC 210101304 | SHC AMB POSTPONE MESSAGE – CHOOSE DATE         |
| Inclusion       | R HIC 210101305 | SHC AMB POSTPONE MESSAGE – CHOOSE DATE DEFAULT |
| Inclusion       | R HIC 210101306 | SHC AMB POSTPONE MESSAGE – 2 DAYS              |
| Exclusion       | R HIC 104       | VIEW REPORT                                    |
| Exclusion       | R HIC 116       | MARK AS NEW                                    |
| Exclusion       | R HIC 125       | RETRACT MESSAGE                                |
| Exclusion       | R HIC 128       | EDIT OUT BASKET                                |
| Exclusion       | R HIC 129       | FORWARD OUT BASKET                             |
| Exclusion       | R HIC 131       | CLEAR ONLY-SENT MESSAGES                       |
| Exclusion       | R HIC 132       | UNDO CLEAR-SENT MESSAGES                       |

**eFigure 3. Time Metric Definitions**

| <b>Metric</b>     | <b>Start Message View</b> | <b>Other Action Started</b> |  |
|-------------------|---------------------------|-----------------------------|--|
| Other Action Time | Start Interval            | End Interval                |  |

| <b>Metric</b>     | <b>Start Message View</b> | <b>Clicked on "Reply to Patient", "Start Blank Reply", or "Start with Draft"</b> | <b>Message Sent</b> |
|-------------------|---------------------------|----------------------------------------------------------------------------------|---------------------|
| Reply Action Time | Start Interval            |                                                                                  | End Interval        |
| Read Time         | Start Interval            | End Interval                                                                     |                     |
| Write Time        |                           | Start Interval                                                                   | End Interval        |

**eFigure 4. Pre- and Postsurvey Questionnaire**

| Pre-Measurement Survey                                                                                                                                                                                                                                                                                                                                                                                                                                                                                                                                                                                                                                                                                                                                  | Post-Measurement Survey                                                                                                                                                                                                                                                                                                                                                                                                                                                                                                                                                                                                                                                                                                                                                                           |
|---------------------------------------------------------------------------------------------------------------------------------------------------------------------------------------------------------------------------------------------------------------------------------------------------------------------------------------------------------------------------------------------------------------------------------------------------------------------------------------------------------------------------------------------------------------------------------------------------------------------------------------------------------------------------------------------------------------------------------------------------------|---------------------------------------------------------------------------------------------------------------------------------------------------------------------------------------------------------------------------------------------------------------------------------------------------------------------------------------------------------------------------------------------------------------------------------------------------------------------------------------------------------------------------------------------------------------------------------------------------------------------------------------------------------------------------------------------------------------------------------------------------------------------------------------------------|
| <p><b>Physician Task Load Derivative Index</b></p> <p>Please reflect on a day that you responded to patient messages in the last 1-2 weeks that is representative of a typical current day responding to patient messages, and move the sliders to indicate your response (Very Low, Low, Medium, High, Very High; 0-100 continuous):</p> <ul style="list-style-type: none"> <li>• How mentally demanding was the task of responding to patient messages?</li> <li>• How hurried or rushed was the pace of responding to patient messages?</li> <li>• How hard did you have to work to achieve your level of performance responding to patient messages?</li> <li>• How physically demanding was the task of responding to patient messages?</li> </ul> | <p><b>Physician Task Load Derivative Index</b></p> <p>Please reflect on a day that you responded to patient messages in the last 1-2 weeks that is representative of a typical current day responding to patient messages using the AI-generated draft replies tool, and move the sliders to indicate your response (Very Low, Low, Medium, High, Very High; 0-100 continuous):</p> <ul style="list-style-type: none"> <li>• How mentally demanding was the task of responding to patient messages?</li> <li>• How hurried or rushed was the pace of responding to patient messages?</li> <li>• How hard did you have to work to achieve your level of performance responding to patient messages?</li> <li>• How physically demanding was the task of responding to patient messages?</li> </ul> |
| <p><b>Burnout and Emotional Exhaustion Score</b></p> <p>To what degree have you experienced the following? (0-4; Not at all, Very Little, Moderately, A Lot, Extremely) During the past two weeks, I have felt...</p> <ul style="list-style-type: none"> <li>• A sense of dread when I think about work I have to do.</li> <li>• Physically exhausted at work.</li> <li>• Lacking in enthusiasm at work.</li> <li>• Emotionally exhausted at work.</li> </ul>                                                                                                                                                                                                                                                                                           | <p><b>Burnout and Emotional Exhaustion Score</b></p> <p>To what degree have you experienced the following? (0-4; Not at all, Very Little, Moderately, A Lot, Extremely) During the past two weeks, I have felt...</p> <ul style="list-style-type: none"> <li>• A sense of dread when I think about work I have to do.</li> <li>• Physically exhausted at work.</li> <li>• Lacking in enthusiasm at work.</li> <li>• Emotionally exhausted at work.</li> </ul>                                                                                                                                                                                                                                                                                                                                     |
| <p><b>Anticipated Utility</b></p> <p>In your opinion, what is the likelihood that AI-generated draft replies embedded in the EHR in-basket would...</p> <ul style="list-style-type: none"> <li>• be useful to respond to patient messages.</li> <li>• decrease the amount of time it takes to respond to patient messages.</li> <li>• improve the quality of my responses to patient messages.</li> <li>• would draft responses to patient messages in the appropriate voice/tone.</li> </ul>                                                                                                                                                                                                                                                           | <p><b>Utility</b></p> <p>Based on your experience using AI-generated draft replies embedded in the EHR in-basket, please indicate how much you agree or disagree with the following statements:</p> <ul style="list-style-type: none"> <li>• The AI-generated draft replies were useful when responding to patient messages.</li> <li>• The AI-generated draft replies decreased the amount of time it takes to respond to patient messages.</li> <li>• The AI-generated draft replies improved the quality of my responses to patient messages.</li> <li>• The AI-generated draft replies were written in the appropriate voice/tone.</li> </ul>                                                                                                                                                 |
|                                                                                                                                                                                                                                                                                                                                                                                                                                                                                                                                                                                                                                                                                                                                                         | <p><b>Net Promotor</b></p> <p>How likely are you to recommend using the AI-generated draft replies tool to respond to patient messages to a colleague? (0-10)</p>                                                                                                                                                                                                                                                                                                                                                                                                                                                                                                                                                                                                                                 |

|  |                                                                                                                                                                                          |
|--|------------------------------------------------------------------------------------------------------------------------------------------------------------------------------------------|
|  | <p><b>Free-Text Response</b></p> <p>Please provide any additional comments or feedback regarding the utility and workflow impact of the AI-generated draft replies tool (free-text).</p> |
|--|------------------------------------------------------------------------------------------------------------------------------------------------------------------------------------------|



**eFigure 5. Clinician Recruitment Flowchart**

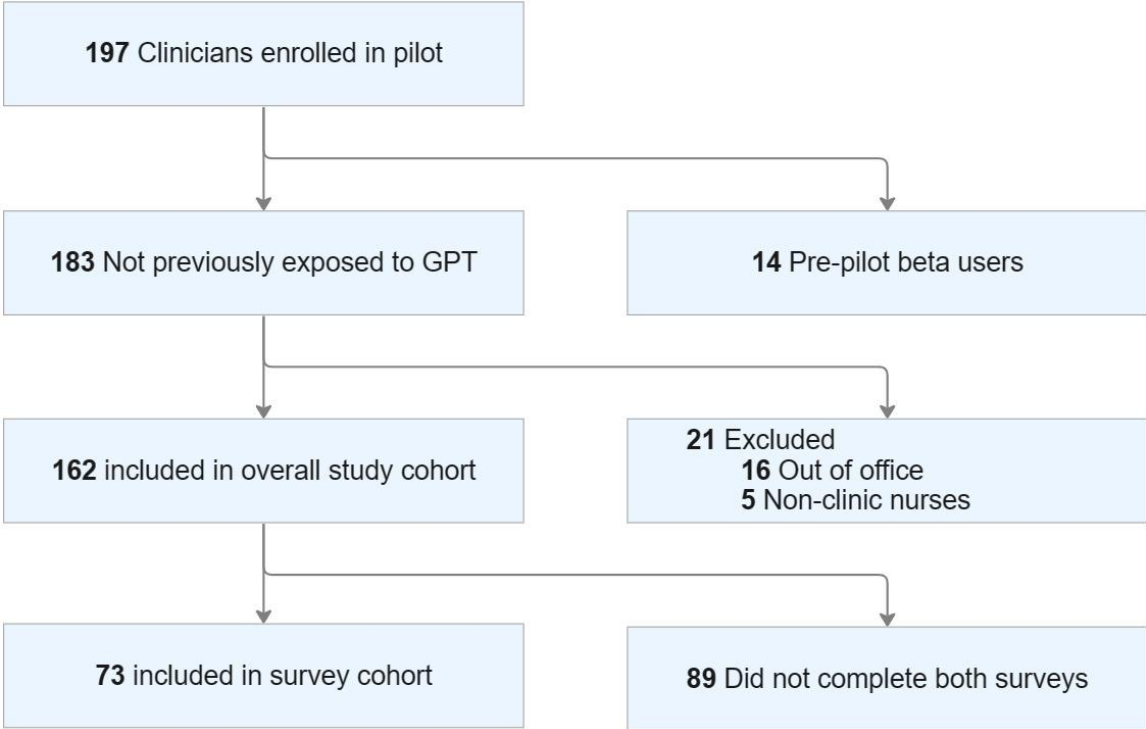

**eFigure 6. Histogram of Draft Utilization per Clinician With Pareto**

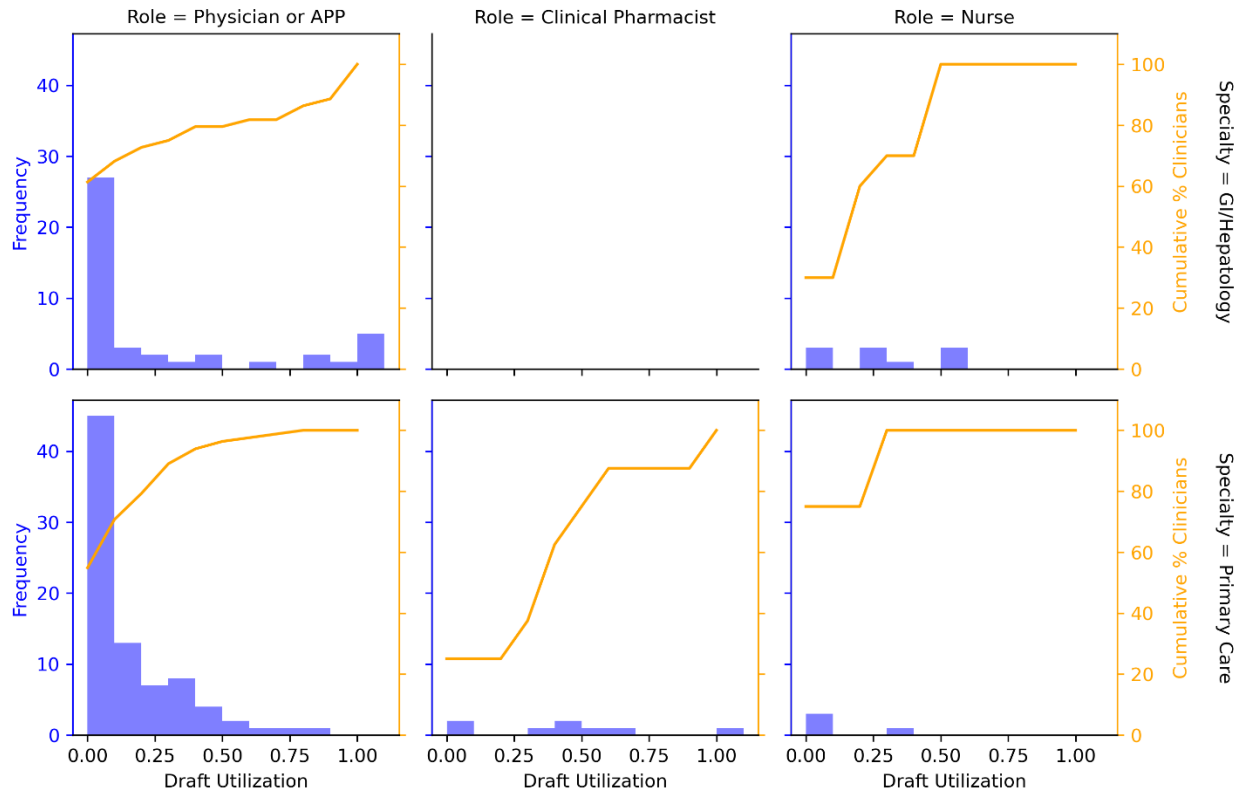

**eFigure 7. Draft Utilization vs Reply Action Count per Clinician**

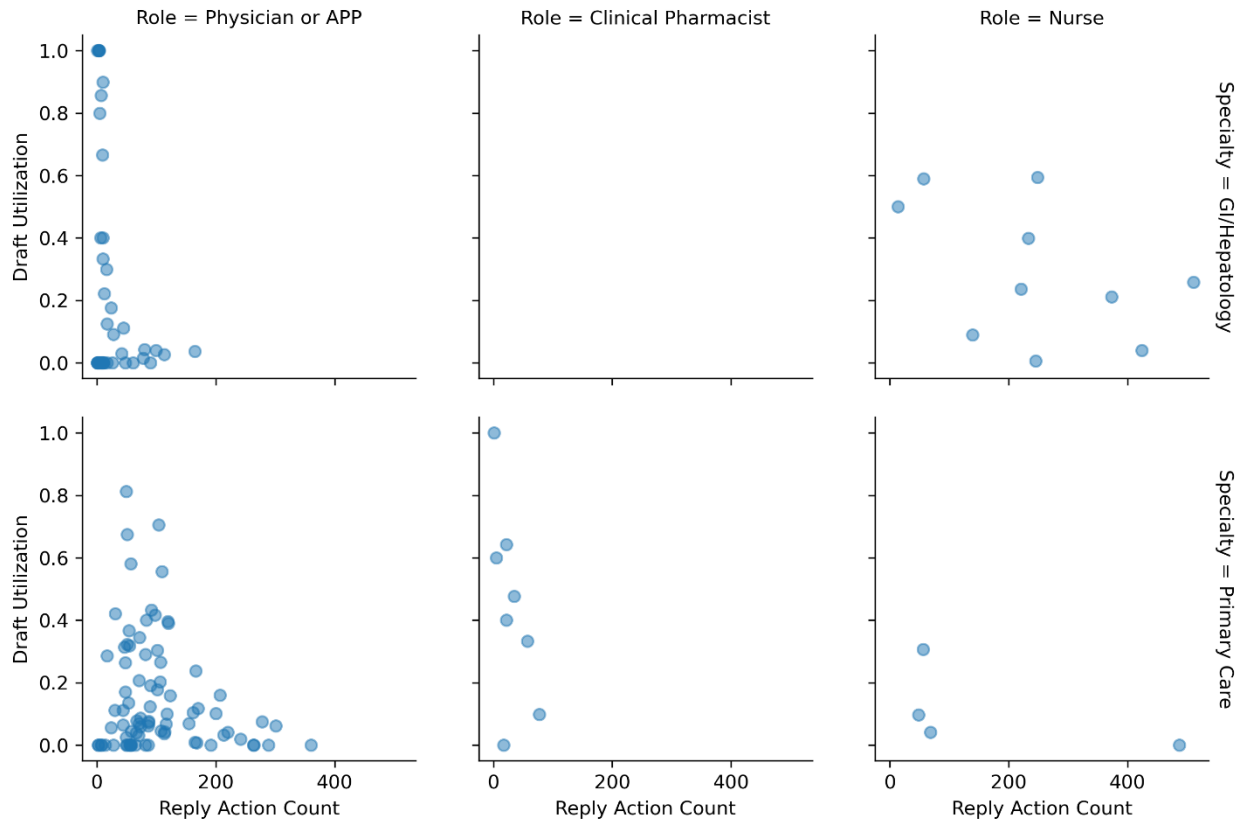

**eTable 3. Draft Availability for All Unique Messages Viewed, Acted on or Replied to**

| <b>Metric</b>                          | <b>Category</b>                                 | <b>Counts</b> | <b>Percentages</b> |
|----------------------------------------|-------------------------------------------------|---------------|--------------------|
| <b>Messages with Views</b>             | <b>Total</b>                                    | <b>32829</b>  | <b>100.00%</b>     |
|                                        | Drafts Available                                | 23164         | 70.56%             |
| <b>Messages with Other Actions</b>     | <b>Total</b>                                    | <b>15694</b>  | <b>100.00%</b>     |
|                                        | Drafts Available                                | 10679         | 68.05%             |
| <b>Messages with Patient Replies</b>   | <b>Total</b>                                    | <b>12844</b>  | <b>100.00%</b>     |
|                                        | Drafts Available                                | 9621          | 74.91%             |
|                                        | Excluded Messages                               | 2596          | 20.21%             |
|                                        | Categorization Errors                           | 389           | 3.03%              |
|                                        | <i>HTTP timeout was hit for OpenAI</i>          | 282           | 2.20%              |
|                                        | <i>Request to LLM timed out</i>                 | 107           | 0.83%              |
|                                        | Generation Error                                | 238           | 1.85%              |
|                                        | <i>Max model length was reached</i>             | 128           | 1.00%              |
|                                        | <i>API error</i>                                | 42            | 0.33%              |
|                                        | <i>HTTP timeout was hit for OpenAI</i>          | 25            | 0.19%              |
|                                        | <i>Response cutoff due to max length limits</i> | 21            | 0.16%              |
|                                        | <i>Prompt was filtered</i>                      | 10            | 0.08%              |
|                                        | <i>Request to LLM timed out</i>                 | 8             | 0.06%              |
| <i>Response to prompt was filtered</i> | 4                                               | 0.03%         |                    |

**eFigure 8. Average Time Spent per Clinician on Actions in Pre-pilot vs Pilot Periods**

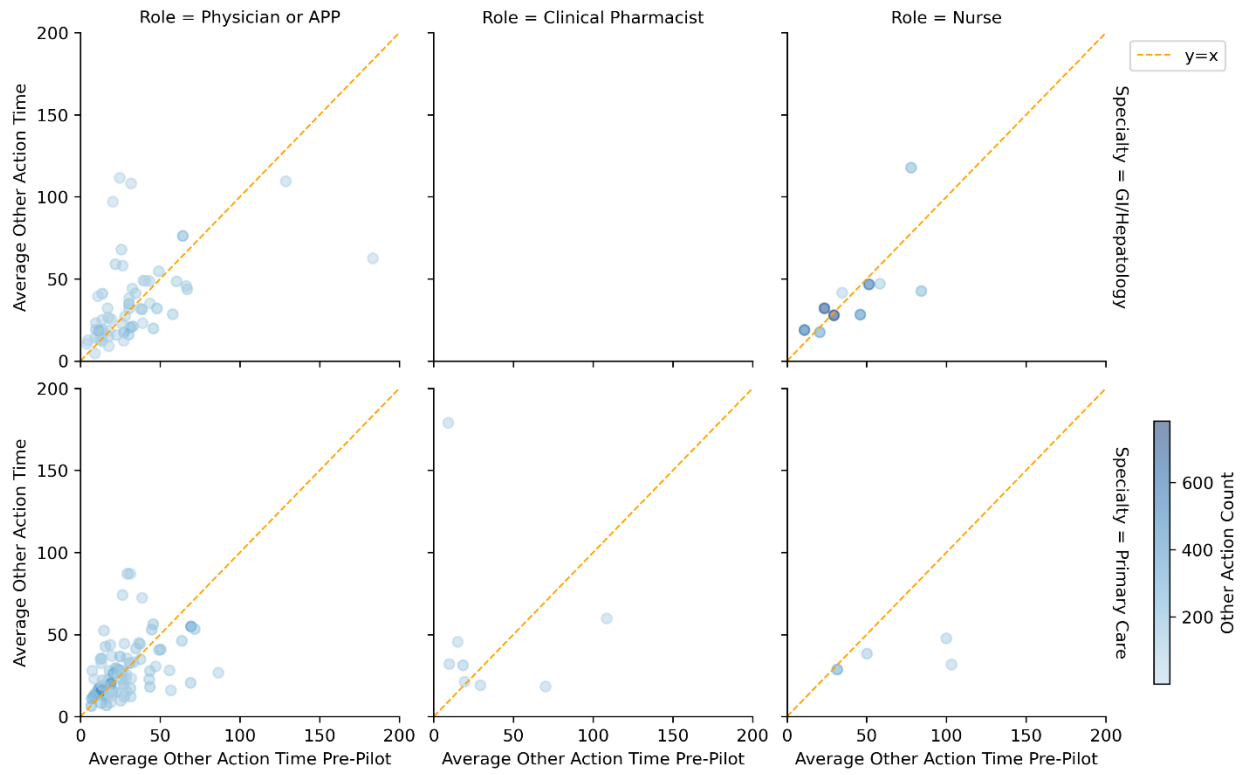

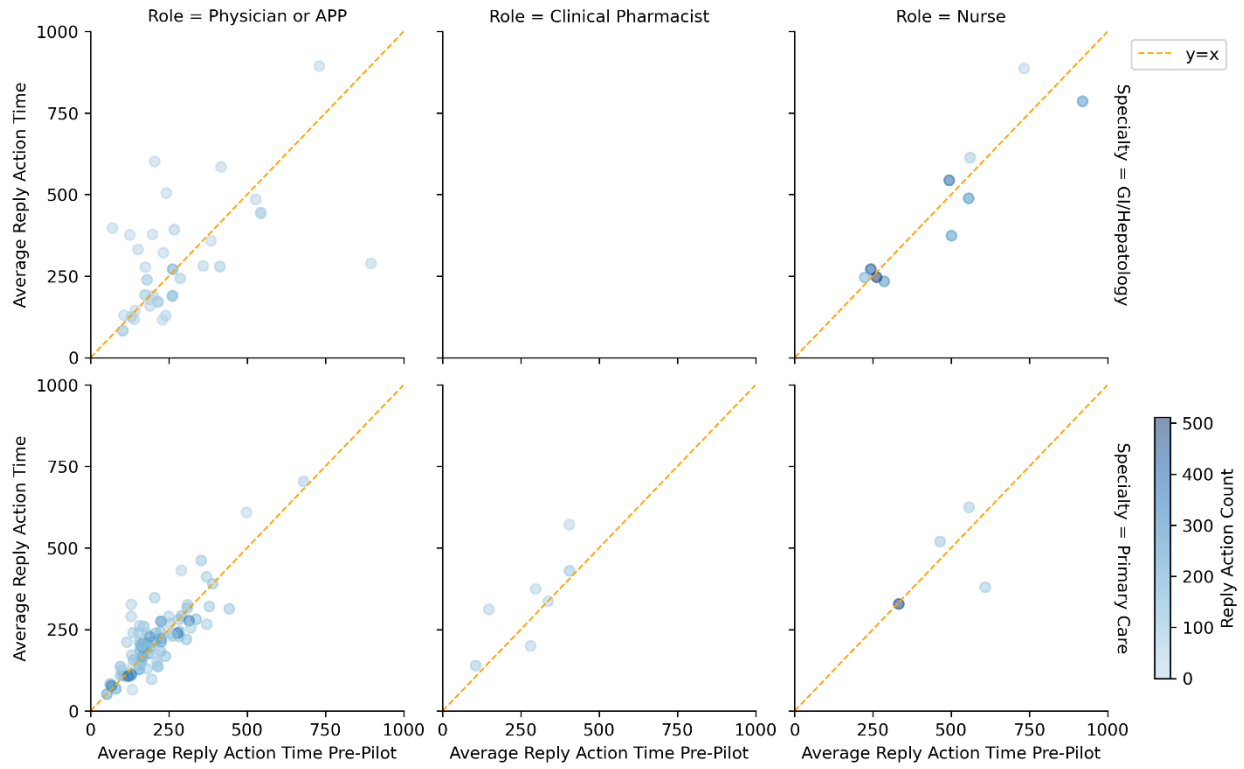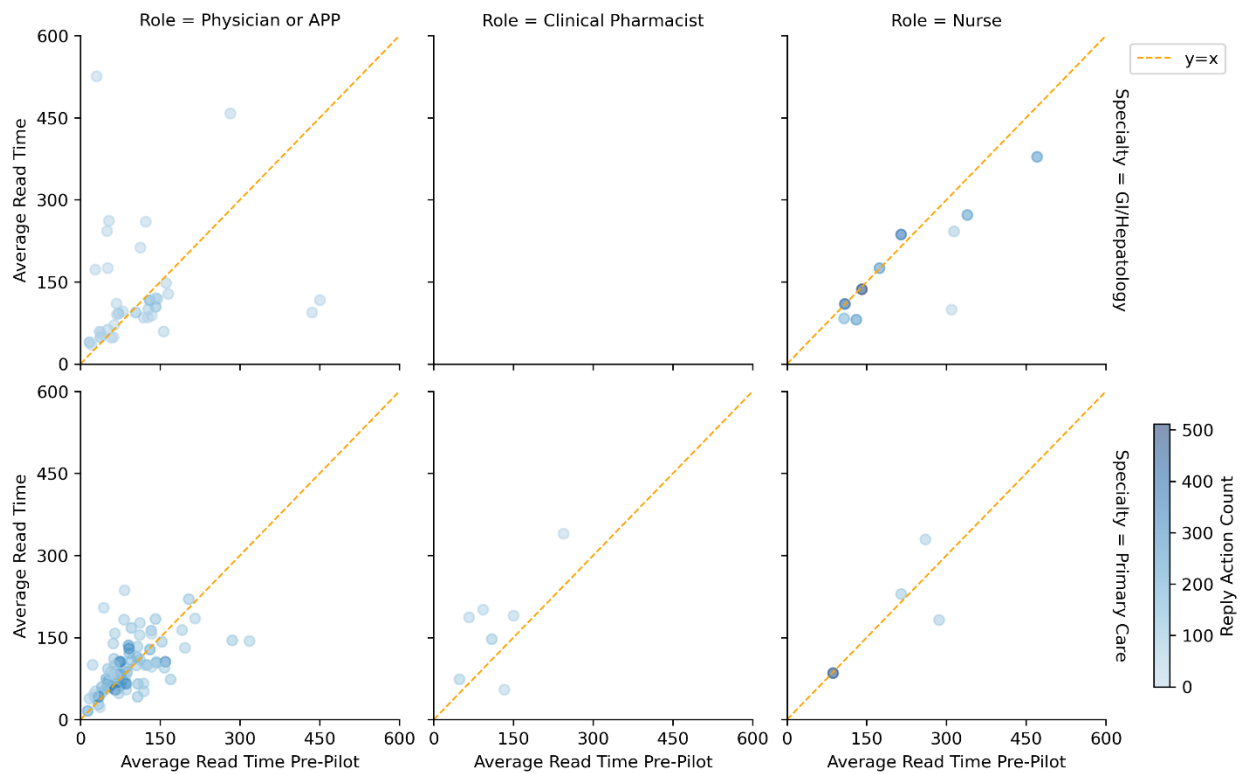

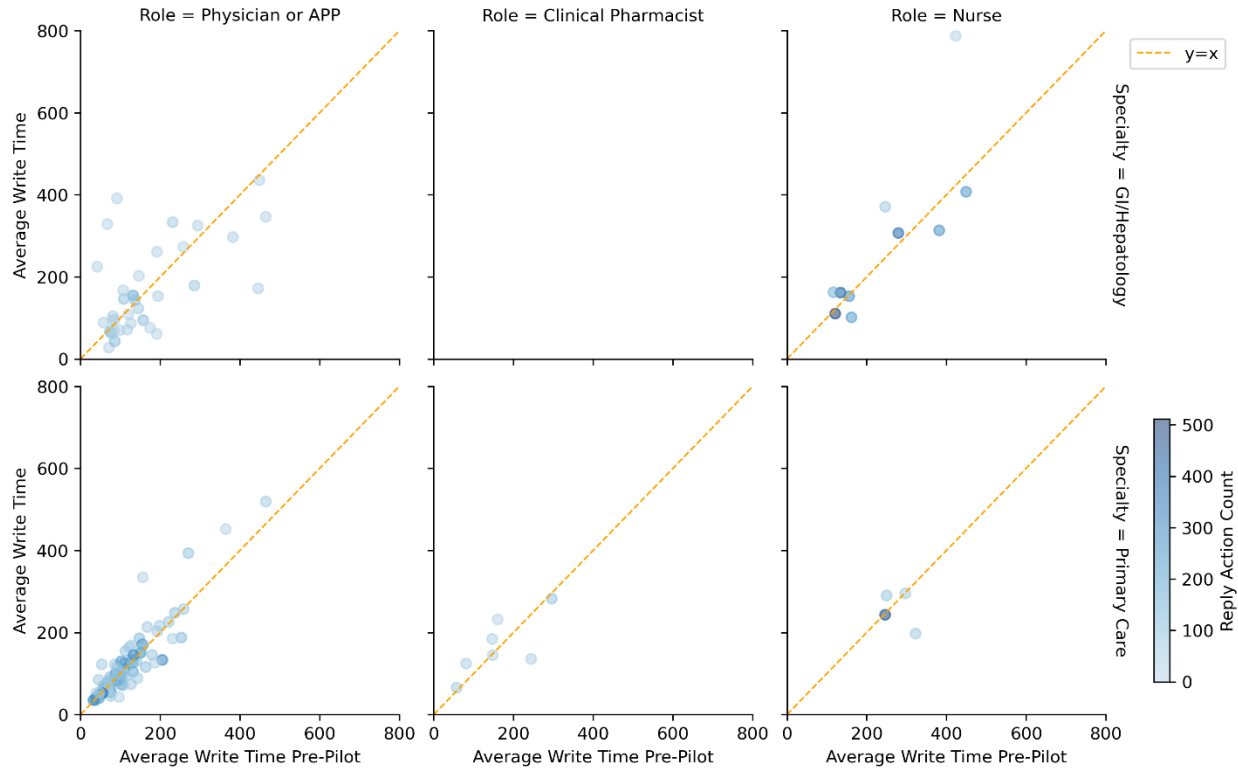

**eFigure 9. Average Time Spent on Actions in Pre-pilot vs Pilot Periods Using a Linear Mixed Effects Model**

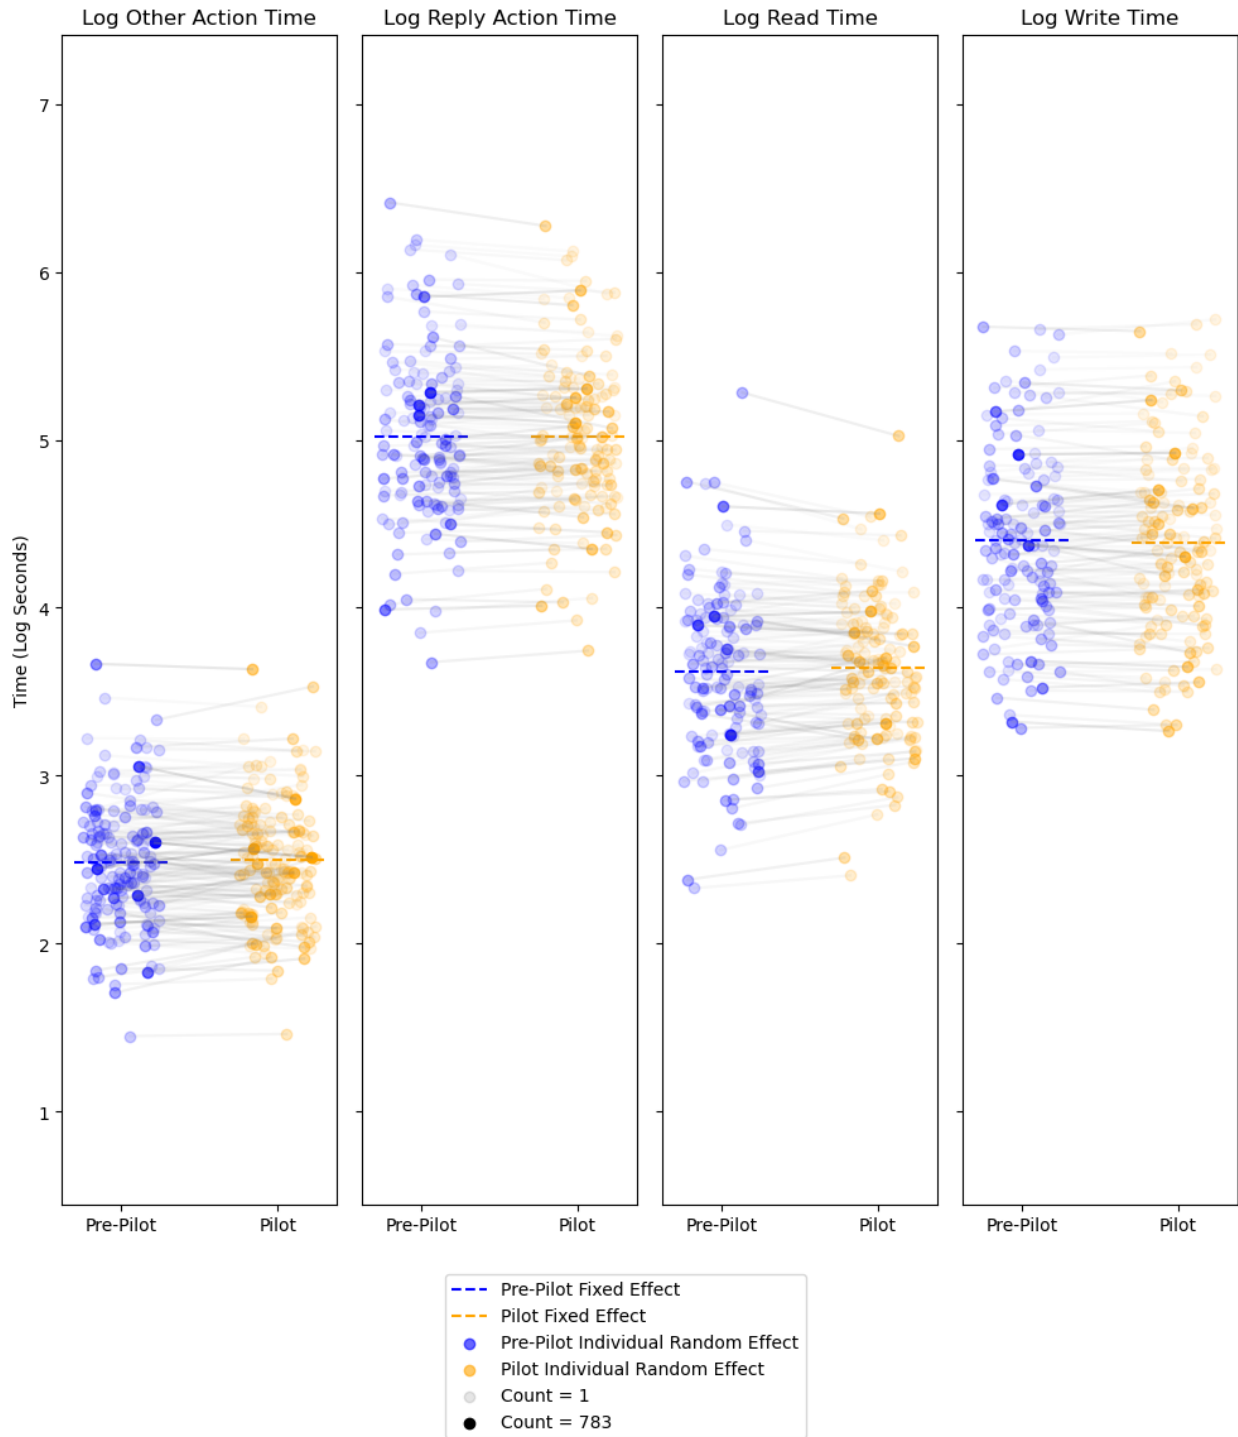



**eTable 4. Impact of Draft Messages on Change in Log-Transformed Time Spent, Analyzed by Linear Mixed Effects Models**

| <b>Metric</b>     | <b>No. of observations</b> | <b>No. of groups (clinicians)</b> | <b>Mean group size (messages per clinician)</b> | <b>Intervention coefficient (change in time, log(s))</b> | <b>Coefficient Standard Error</b> | <b>p-value</b> |
|-------------------|----------------------------|-----------------------------------|-------------------------------------------------|----------------------------------------------------------|-----------------------------------|----------------|
| Other Action Time | 32153                      | 161                               | 199.7                                           | 0.014                                                    | 0.035                             | 0.475          |
| Reply Action Time | 24847                      | 138                               | 180.1                                           | -0.003                                                   | 0.017                             | 0.859          |
| Read Time         | -                          | -                                 | -                                               | 0.020                                                    | 0.025                             | 0.427          |
| Write Time        | -                          | -                                 | -                                               | -0.008                                                   | 0.018                             | 0.651          |
