# Supplementary material for: Artificial Intelligence–Generated Draft Replies to Patient Inbox Messages
Source: PubMed Central journal article supplement (PMC10955355; doi:10.1001/jamanetworkopen.2024.3201), 2024-03-20
Supplement: jamanetwopen-e243201-s002.pdf [file jamanetwopen-e243201-s002.pdf]

## Data Sharing Statement

Garcia. Artificial Intelligence–Generated Draft Replies to Patient Inbox Messages. *JAMA Netw Open*. Published March 20, 2024. doi:10.1001/jamanetworkopen.2024.3201

### Data

**Data available:** No
